# Supplementary material
Source: publisher site journal article supplement (https://www.dovepress.com/article/332555)
Supplement: Supplementary file 1 [file get_supplementary_file.php]

# Supplemental Materials

**Supplemental Table S1. Geographic Distribution of Respondents at Baseline and Follow-up**

| **US state, n** | **Baseline**  **(n=100)** | **Follow-up**  **(n=46)** |
| --- | --- | --- |
| Arizona | 2 | 0 |
| California | 16 | 9 |
| Connecticut | 1 | 1 |
| Delaware | 1 | 1 |
| District of Columbia | 2 | 2 |
| Florida | 2 | 0 |
| Georgia | 4 | 2 |
| Hawaii | 1 | 1 |
| Idaho | 1 | 1 |
| Illinois | 4 | 1 |
| Indiana | 1 | 0 |
| Maine | 1 | 1 |
| Maryland | 2 | 1 |
| Massachusetts | 3 | 1 |
| Michigan | 3 | 0 |
| Minnesota | 1 | 1 |
| Mississippi | 3 | 1 |
| Missouri | 1 | 0 |
| New Jersey | 4 | 0 |
| New York | 9 | 4 |
| North Carolina | 5 | 3 |
| Ohio | 5 | 2 |
| Pennsylvania | 4 | 1 |
| Rhode Island | 2 | 1 |
| South Carolina | 1 | 1 |
| Tennessee | 2 | 1 |
| Texas | 13 | 8 |
| Virginia | 2 | 1 |
| Washington | 2 | 0 |
| Wisconsin | 2 | 1 |

**Supplemental Figure S1. HIVTSQs total scores by subgroups.**

**
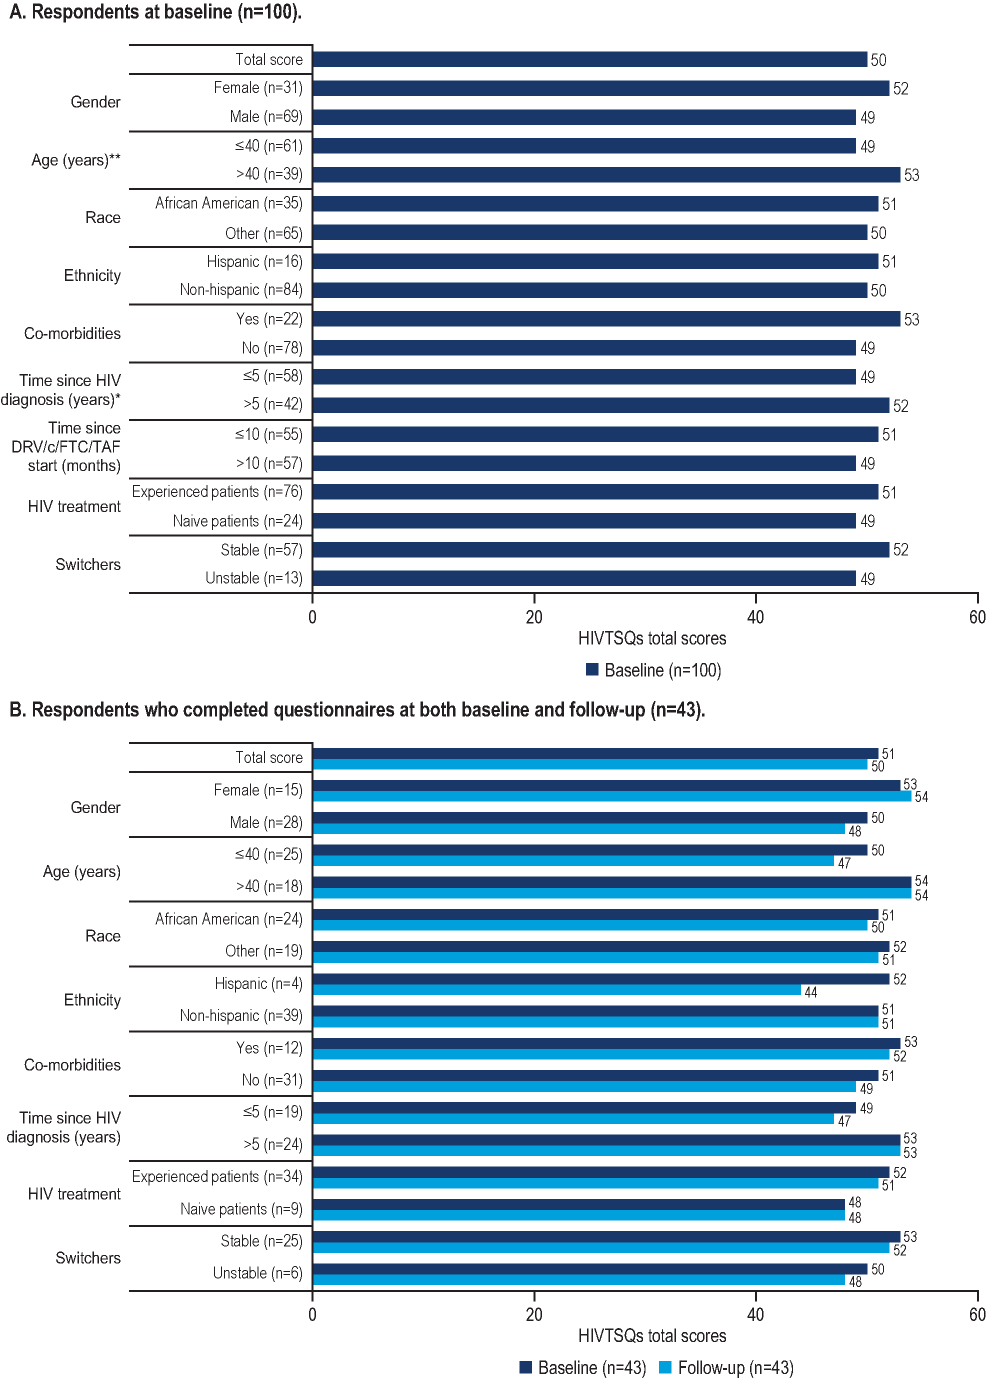
**

HIVTSQs, HIV Treatment Satisfaction Questionnaire status version; HIV, human immunodeficiency virus; DRV/c/FTC/TAF, darunavir/cobicistat/emtricitabine/tenofovir alafenamide.

*****Significant p-value (<0.05).

******Significant p-value (<0.01).

**Supplemental Figure S2. HIV-SDM total scores by subgroups.**


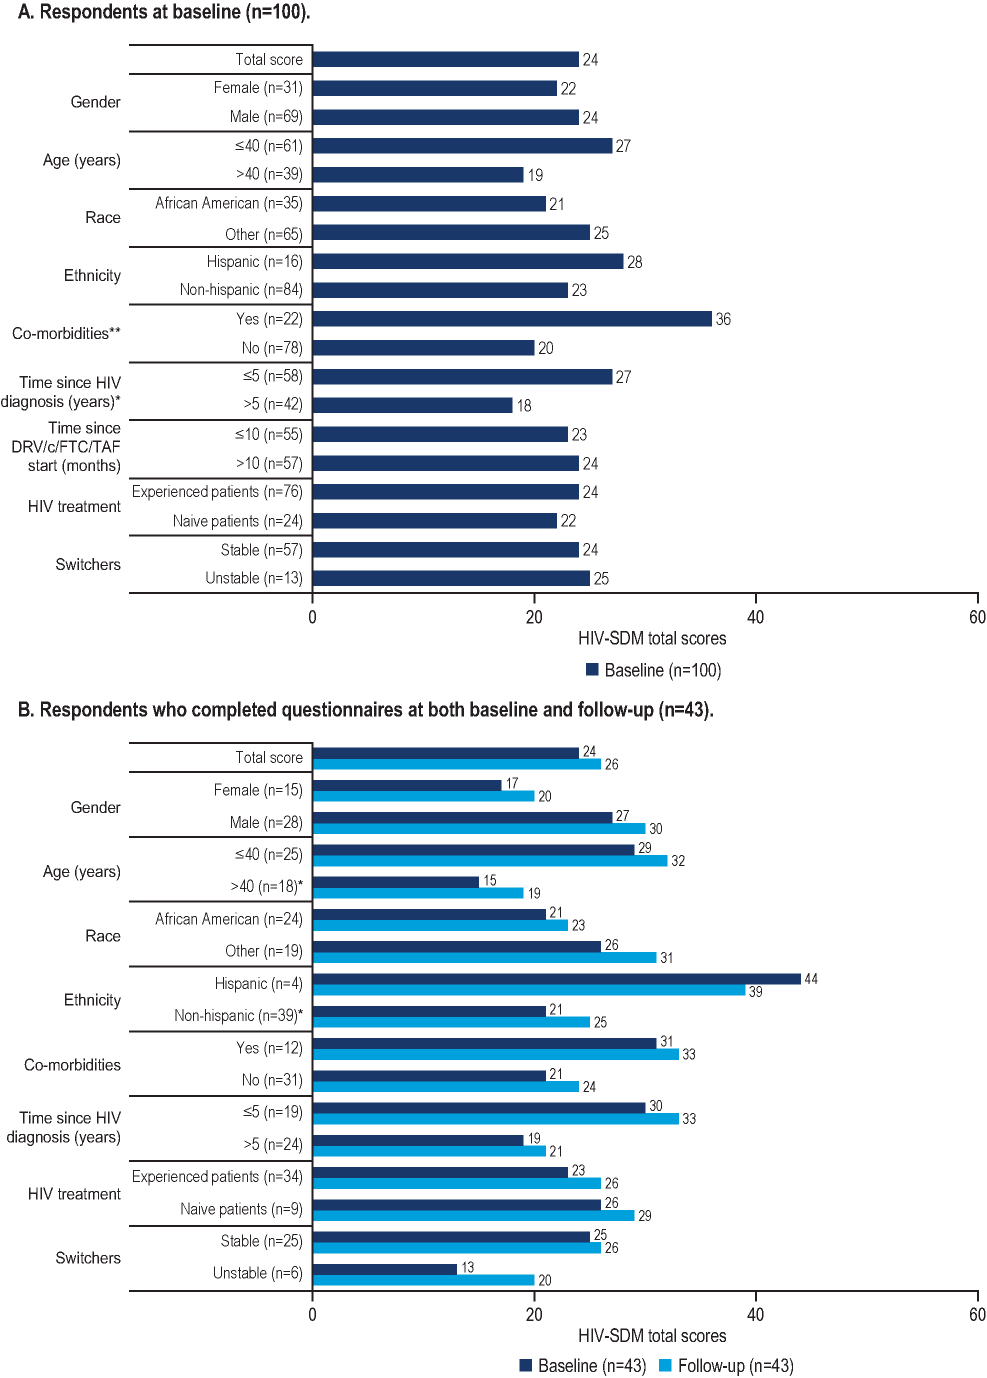


HIV-SDM, HIV Symptom Distress Module; HIV, human immunodeficiency virus; DRV/c/FTC/TAF, darunavir/cobicistat/emtricitabine/tenofovir alafenamide.

*****Significant p-value (<0.05).

******Significant p-value (<0.01).

**Supplemental Figure S3.** **Percentage of respondents reporting symptoms on HIV-SDM among those who completed questionnaires at both baseline and follow-up.a**

**
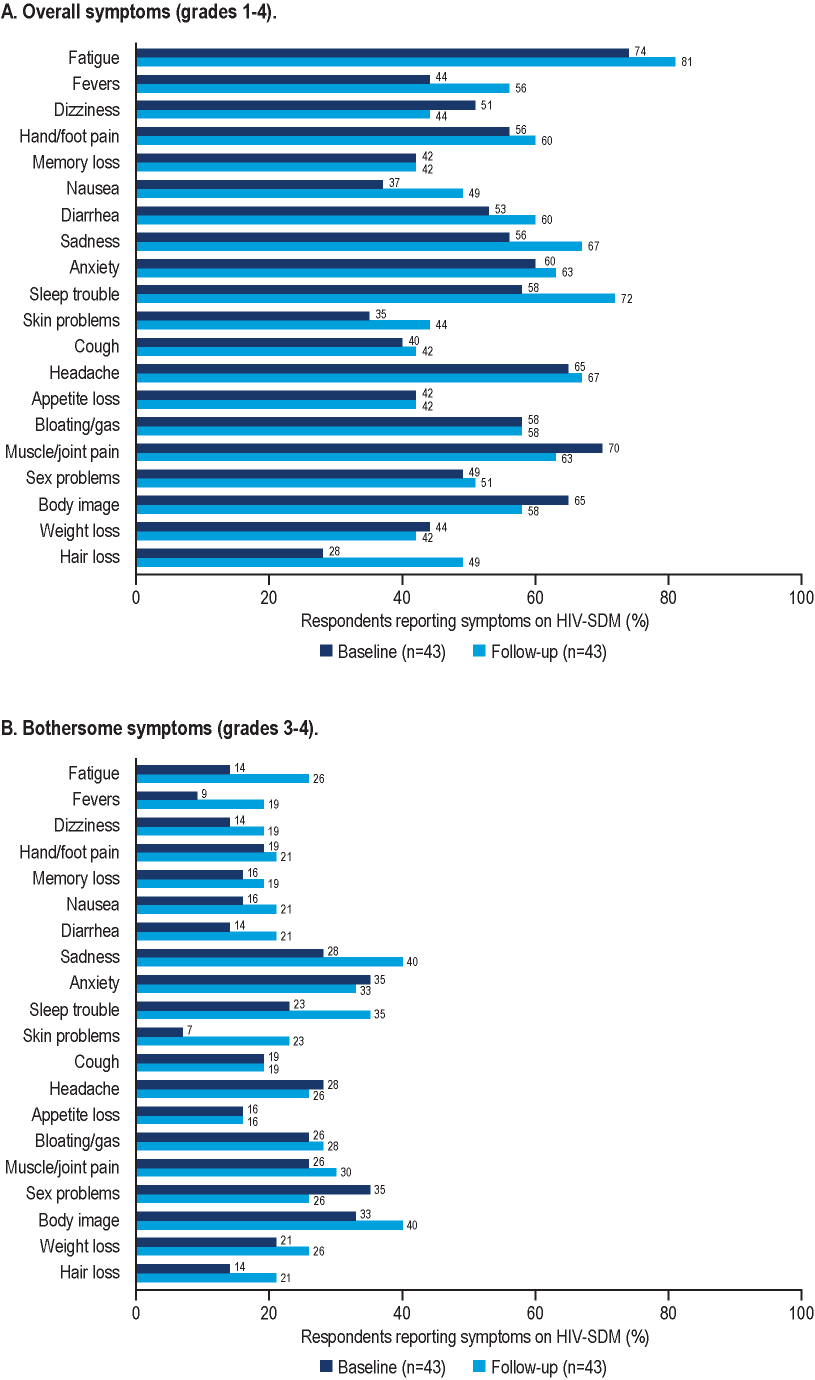
**

HIV-SDM, HIV Symptom Distress Module.

aHIV-SDM item names abbreviated as in prior studies.1

**Supplemental Figure S4. HIVTSQs according to symptom grades experienced (HIV-SDM) at baseline.**


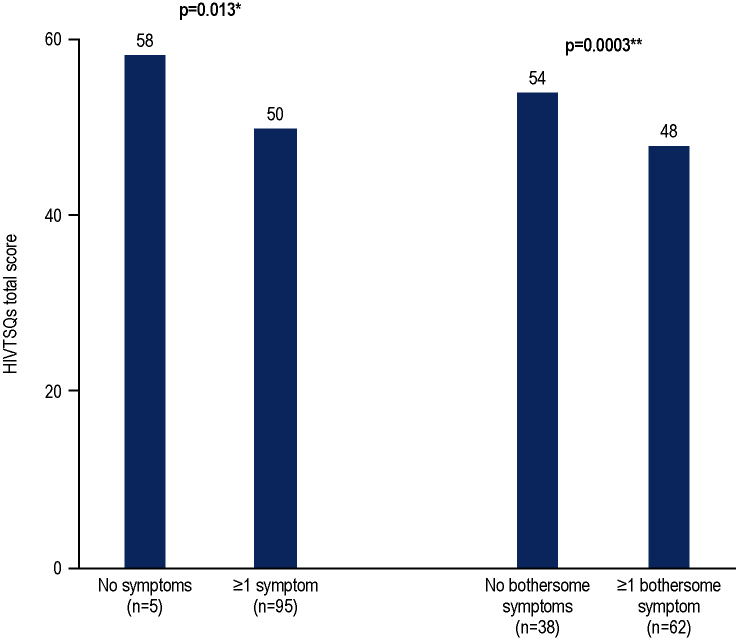


HIVTSQs, HIV Treatment Satisfaction Questionnaire status version; HIV-SDM, HIV Symptom Distress Module.

*****Significant p-value (<0.05).

******Significant p-value (<0.01).

**References**

1. Justice AC, Holmes W, Gifford AL, et al. Development and validation of a self-completed HIV symptom index. *J Clin Epidemiol.* 2001;54 Suppl 1:S77-90.
